# Supplementary material for: Insights into the specific capacitance of CNT-based supercapacitor electrodes using artificial intelligence
Source: Royal Society of Chemistry journal article supplement (doi:10.1039/d4ra05546b), 2025-01-01
Supplement: d4ra05546b1.pdf [file d4ra05546b1.pdf]

## Gain Insights the Specific Capacitance of CNT-Based Supercapacitor Electrodes with Artificial Intelligence

Wael Z. Tawfik<sup>1\*</sup>, Mohamed Shaban<sup>2\*</sup>, Athira Raveendran<sup>3</sup>, June Key Lee<sup>4</sup>, Abdullah M. Al-Enizi<sup>5</sup>

<sup>1</sup>Physics Department, Faculty of Science, Beni-Suef University, Beni-Suef 62511, Egypt

<sup>2</sup>Department of Physics, Faculty of Science, Islamic University of Madinah, Madinah 42351, Saudi Arabia

<sup>3</sup>Department Department of Radiology and Biomedical Imaging, University of California, San Francisco, California 94107, United States of America

<sup>4</sup>Department of Materials Science and Engineering, Chonnam National University, Gwangju 61186, Republic of Korea

<sup>5</sup>Department of Chemistry, College of Science, King Saud University, P.O. Box 2455, Riyadh 11451, Saudi Arabia

\* Corresponding authors: [wael.farag@science.bsu.edu.eg](mailto:wael.farag@science.bsu.edu.eg), [mssfadel@aucegypt.edu](mailto:mssfadel@aucegypt.edu)

**Table S1.** Dataset of the input and output data to the ML models.

| ECF          | EC (M) | EIC | SSA (m <sup>2</sup> /g) | PS (nm) | Id/Ig | N (at. %) | O (at. %) | VW (V) | Capacitance (F/g) |
|--------------|--------|-----|-------------------------|---------|-------|-----------|-----------|--------|-------------------|
| TEABF4/PC    | 1      | 0   | 20                      | 22.14   | 1.02  | 0         | 0         | 3.5    | 35                |
| TEABF4/PC    | 1      | 0   | 73                      | 10.08   | 0.88  | 0         | 0         | 3.5    | 36                |
| TEABF4/PC    | 1      | 0   | 111                     | 6.99    | 0.9   | 0         | 0         | 3.5    | 36                |
| TEABF4/PC    | 1      | 0   | 156                     | 7.74    | 0.85  | 0         | 0         | 3.5    | 37                |
| TEABF4/PC    | 1      | 0   | 229                     | 7.61    | 0.86  | 0         | 0         | 3.5    | 37                |
| TEABF4/PC    | 1      | 0   | 247                     | 5.92    | 0.83  | 0         | 0         | 3.5    | 40                |
| LiClO4/EC/PC | 1      | 0   | 146.12                  | 0       | 0     | 0         | 0         | 2.6    | 21.8              |
| LiClO4/EC/PC | 1      | 0   | 159.74                  | 0       | 0     | 0         | 0         | 2.6    | 60.4              |
| NEt4BF4/PC   | 1      | 0   | 156                     | 15      | 0     | 0         | 0         | 2.7    | 35                |
| H2SO4        | 0.5    | 7   | 538.9                   | 0       | 1.05  | 0         | 0         | 1      | 326.5             |
| H2SO4        | 0.5    | 7   | 415                     | 0       | 1.05  | 0         | 0         | 1      | 192.01            |
| H2SO4        | 0.5    | 7   | 389                     | 0       | 1.05  | 0         | 0         | 1      | 69                |
| H2SO4        | 0.5    | 7   | 354                     | 0       | 1.05  | 0         | 0         | 1      | 51                |
| H2SO4        | 0.5    | 7   | 341                     | 0       | 1.05  | 0         | 0         | 1      | 45                |
| KOH          | 6      | 6   | 2158                    | 1.9     | 0.98  | 0         | 0         | 0.9    | 200               |
| KOH          | 6      | 6   | 2158                    | 1.9     | 0.98  | 0         | 0         | 0.9    | 200               |
| LiPF6        | 1      | 0   | 810                     | 0       | 1.22  | 0         | 0         | 2.8    | 30                |
| LiPF6        | 1      | 0   | 1340                    | 0       | 1.08  | 0         | 0         | 2.8    | 45                |
| H2SO4        | 1      | 7   | 3160                    | 0.8     | 1.1   | 0         | 0         | 2      | 295               |
| H2SO4        | 1      | 7   | 3110                    | 0.7     | 1.1   | 0         | 0         | 2      | 280               |

|         |     |   |         |       |       |      |      |     |       |
|---------|-----|---|---------|-------|-------|------|------|-----|-------|
| H2SO4   | 1   | 7 | 2930    | 0.75  | 1.1   | 0    | 0    | 2   | 305   |
| Et4NBF4 | 1   | 0 | 830     | 0.8   | 1.2   | 0    | 0    | 2.5 | 170   |
| KOH     | 6   | 6 | 1080    | 0.7   | 1.25  | 0    | 0    | 0.6 | 125   |
| KOH     | 6   | 6 | 1429    | 1.6   | 1.075 | 0    | 0    | 0.6 | 200   |
| TEABF4  | 1   | 0 | 0       | 0     | 1.08  | 4.85 | 7.52 | 3   | 110   |
| TEABF4  | 1   | 0 | 0       | 0     | 1.08  | 4.85 | 7.52 | 3   | 82.7  |
| LiPF6   | 1   | 0 | 233     | 15.45 | 0.98  | 5.24 | 8    | 2   | 33    |
| LiPF6   | 1   | 0 | 176     | 15.91 | 0.98  | 0    | 0    | 2   | 15    |
| H2SO4   | 0.5 | 7 | 33.1    | 20    | 0     | 0    | 0    | 1   | 252.4 |
| H2SO4   | 0.5 | 7 | 17.6    | 0     | 0     | 0    | 0    | 1   | 39.7  |
| KOH     | 6   | 6 | 0       | 0     | 0.33  | 0    | 0    | 0.8 | 104   |
| H2SO4   | 1   | 7 | 379.9   | 5.4   | 1.15  | 1.53 | 3.1  | 1   | 227   |
| H2SO4   | 1   | 7 | 2005.9  | 0.55  | 1.12  | 0.1  | 6.27 | 1   | 319   |
| EMIMBF4 |     | 0 | 2005.9  | 0.55  | 1.12  | 0.1  | 6.27 | 3.5 | 140   |
| KOH     | 6   | 6 | 263     | 4.7   | 1.03  | 0    | 0    | 0.9 | 162.3 |
| H2SO4   | 1   | 7 | 272     | 10    | 0.88  | 0    | 0    | 0.8 | 20    |
| H2SO4   | 1   | 7 | 200     | 9     | 0.88  | 1.8  | 0    | 0.8 | 50    |
| H2SO4   | 1   | 7 | 172     | 10.47 | 0.88  | 2.5  | 0    | 0.8 | 56    |
| Na2SO4  | 0.5 | 3 | 325.48  | 5.32  | 1.02  | 0    | 4.43 | 1.8 | 29    |
| Na2SO4  | 0.5 | 3 | 489.39  | 6.23  | 1.02  | 0    | 0    | 1.8 | 78    |
| Na2SO4  | 0.5 | 3 | 1889.12 | 3.78  | 1.02  | 6.71 | 7.89 | 1.8 | 105.4 |
| H2SO4   | 1   | 7 | 0       | 0     | 0     | 0    | 0    | 1   | 187   |
| KOH     | 6   | 6 | 123.78  | 0.82  | 0.85  | 0    | 2.71 | 1   | 145   |
| KOH     | 6   | 6 | 311.05  | 0     | 0.85  | 0    | 0    | 1   | 170   |
| KOH     | 6   | 6 | 128.54  | 0     | 0.85  | 0    | 0    | 1   | 143   |
| H2SO4   | 1   | 7 | 705.9   | 9.92  | 0.95  | 19.8 | 11.1 | 1   | 411.8 |
| H2SO4   | 1   | 7 | 212.4   | 4.71  | 0.95  | 15.8 | 4    | 1   | 272   |
| KOH     | 6   | 6 | 312     | 3.33  | 0.78  | 1.2  | 5.6  | 0.9 | 125   |
| KOH     | 6   | 6 | 1588    | 2.54  | 0.84  | 5.3  | 9.3  | 0.9 | 240.4 |
| KOH     | 6   | 6 | 2665    | 2.19  | 0.81  | 1.1  | 10.9 | 0.9 | 279.1 |
| KOH     | 6   | 6 | 2856    | 1.75  | 0.83  | 2.2  | 11.1 | 0.9 | 386.2 |
| KOH     | 6   | 6 | 3253    | 2.11  | 0.86  | 0.9  | 7.1  | 0.9 | 365.9 |
| KOH     | 6   | 6 | 811.5   | 0     | 0.9   | 0    | 0    | 1   | 212.7 |
| KOH     | 6   | 6 | 376.3   | 2.181 | 0     | 0    | 0    | 1   | 240   |
| KOH     | 6   | 6 | 1563    | 2.242 | 0     | 0    | 0    | 1   | 245   |
| KOH     | 6   | 6 | 986.7   | 1.791 | 0     | 0    | 0    | 1   | 314   |
| KOH     | 6   | 6 | 1221    | 2.176 | 0     | 0    | 0    | 1   | 290   |
| H2SO4   | 3   | 7 | 44      | 19.09 | 1.02  | 0    | 0    | 0.9 | 0     |
| H2SO4   | 3   | 7 | 498     | 2.41  | 1.02  | 0    | 0    | 0.9 | 0     |
| H2SO4   | 3   | 7 | 549     | 2.33  | 1.02  | 0    | 0    | 0.9 | 0     |
| H2SO4   | 3   | 7 | 609     | 2.04  | 1.02  | 0    | 0    | 0.9 | 0     |
| H2SO4   | 3   | 7 | 818     | 1.66  | 1.02  | 0    | 0    | 0.9 | 0     |
| H2SO4   | 3   | 7 | 998     | 3.97  | 1.02  | 0    | 0    | 0.9 | 0     |

|              |     |   |        |       |       |       |       |     |       |
|--------------|-----|---|--------|-------|-------|-------|-------|-----|-------|
| H2SO4        | 3   | 7 | 1059   | 3.09  | 1.02  | 0     | 0     | 0.9 | 0     |
| H2SO4        | 3   | 7 | 1042   | 2.49  | 1.02  | 0     | 0     | 0.9 | 0     |
| H2SO4        | 3   | 7 | 1014   | 2.21  | 1.02  | 0     | 0     | 0.9 | 0     |
| H2SO4        | 3   | 7 | 1020   | 1.76  | 1.02  | 0     | 0     | 0.9 | 131.8 |
| H2SO4        | 3   | 7 | 1240   | 2.55  | 1.02  | 0     | 0     | 0.9 | 177.3 |
| H2SO4        | 3   | 7 | 1598   | 2.03  | 1.02  | 0     | 0     | 0.9 | 210.7 |
| H2SO4        | 3   | 7 | 1705   | 1.92  | 1.02  | 0     | 0     | 0.9 | 237   |
| H2SO4        | 0   | 7 | 830    | 0     | 1.18  | 0     | 0     | 1   | 252   |
| KOH          | 6   | 6 | 950    | 1.2   | 0.09  | 0     | 5.35  | 1   | 98    |
| KOH          | 6   | 6 | 805    | 1.2   | 0.09  | 0     | 5.3   | 1   | 91    |
| H2SO4        | 1   | 7 | 690    | 0.7   | 0     | 10.8  | 6.9   | 1   | 213   |
| H2SO4        | 1   | 7 | 814    | 0.6   | 0     | 11.6  | 10.1  | 1   | 427   |
| H2SO4        | 1   | 7 | 294    | 1.2   | 0     | 0     | 6.1   | 1   | 25    |
| TEA BF4/AN   | 1   | 0 | 690    | 0.7   | 0     | 10.8  | 6.9   | 2.5 | 110   |
| TEA BF4/AN   | 1   | 0 | 814    | 0.6   | 0     | 11.6  | 10.1  | 2.5 | 94    |
| TEA BF4/AN   | 1   | 0 | 294    | 1.2   | 0     | 0     | 6.1   | 2.5 | 22    |
| EMIMBF4      | 0   | 0 | 1921.7 | 3.06  | 1.905 | 0.93  | 6.4   | 4   | 307.9 |
| EMIMBF4      | 0   | 0 | 2855.7 | 2.21  | 1.74  | 0.51  | 5.07  | 4   | 344.1 |
| H2SO4        | 1   | 7 | 282    | 18.15 | 1.1   | 0     | 0     | 0.9 | 85.8  |
| H2SO4        | 1   | 7 | 999.7  | 3.17  | 1.72  | 10.19 | 4.335 | 0.9 | 166.7 |
| H2SO4        | 1   | 7 | 898.6  | 2.53  | 0     | 0     | 0     | 0.9 | 155.7 |
| H2SO4        | 1   | 7 | 642.5  | 2.22  | 1.53  | 10.97 | 4.735 | 0.9 | 192.1 |
| H2SO4        | 1   | 7 | 884.6  | 2.57  | 1.53  | 10.08 | 3.52  | 0.9 | 222.6 |
| H2SO4        | 1   | 7 | 928.2  | 2.74  | 1.53  | 10.45 | 2.492 | 0.9 | 293.4 |
| KOH          | 6   | 6 | 330.2  | 3     | 0     | 0     | 6.47  | 1   | 177.4 |
| KOH          | 6   | 6 | 449.3  | 3.39  | 0     | 0     | 5.42  | 1   | 249.4 |
| KOH          | 6   | 6 | 524.9  | 3.75  | 0     | 0     | 3.83  | 1   | 356.1 |
| KOH          | 6   | 6 | 620.1  | 3.94  | 0     | 0     | 2.52  | 1   | 381.2 |
| KOH          | 6   | 6 | 569.3  | 3.73  | 0     | 0     | 2.1   | 1   | 323.7 |
| KOH          | 6   | 6 | 681.3  | 5.34  | 0     | 0     | 0     | 1   | 215.8 |
| H2SO4        | 1   | 7 | 8.5    | 16.4  | 2.69  | 15.8  | 3.2   | 1   | 58    |
| H2SO4        | 1   | 7 | 613.8  | 3.09  | 2.38  | 9     | 6.3   | 1   | 216   |
| KOH          | 6   | 6 | 296    | 1     | 0     | 0     | 0     | 0.8 | 4     |
| KOH          | 6   | 6 | 380    | 1     | 0     | 0     | 2.4   | 0.8 | 30    |
| LiPF6/EC/DMC | 1   | 0 | 394    | 0     | 0     | 0     | 5.5   | 3   | 87.6  |
| LiPF6/EC/DMC | 1   | 0 | 394    | 0     | 0     | 0     | 9.8   | 3   | 107.4 |
| LiPF6/EC/DMC | 1   | 0 | 394    | 0     | 0     | 1     | 13.5  | 3   | 0     |
| LiPF6/EC/DMC | 1   | 0 | 394    | 0     | 0     | 5.4   | 13.1  | 3   | 151   |
| LiPF6        | 0.1 | 0 | 214.3  | 23.89 | 1.2   | 0     | 0.3   | 3   | 32    |
| LiPF6        | 0.1 | 0 | 627.8  | 8.67  | 1.47  | 0     | 5.5   | 3   | 0     |
| LiPF6        | 0.1 | 0 | 661.5  | 9.55  | 1.47  | 0     | 5.5   | 3   | 0     |
| LiPF6        | 0.1 | 0 | 1123.2 | 8.48  | 1.47  | 0     | 5.5   | 3   | 160   |
| KOH          | 6   | 6 | 27.8   | 3     | 1.13  | 0     | 0     | 0.9 | 96    |

|        |     |   |        |   |       |      |       |      |       |
|--------|-----|---|--------|---|-------|------|-------|------|-------|
| KOH    | 6   | 6 | 27.8   | 3 | 1.13  | 0    | 0     | 0.9  | 56.47 |
| KOH    | 6   | 6 | 13.72  | 3 | 1.15  | 2.79 | 10.57 | 0.9  | 64    |
| H2SO4  | 1   | 7 | 75     | 0 | 0     | 0    | 0     | 0.85 | 295.4 |
| H2SO4  | 1   | 7 | 75     | 0 | 0     | 0    | 0     | 0.85 | 210   |
| H2SO4  | 1   | 7 | 75     | 0 | 0     | 0    | 0     | 0.85 | 150   |
| H2SO4  | 1   | 7 | 75     | 0 | 0     | 0    | 0     | 0.85 | 109.6 |
| KOH    | 6   | 6 | 97     | 0 | 0.99  | 3.39 | 0     | 0.8  | 171.1 |
| KOH    | 6   | 6 | 54     | 0 | 0.99  | 3.39 | 0     | 0.8  | 107.7 |
| KOH    | 6   | 6 | 76     | 0 | 0.99  | 3.39 | 0     | 0.8  | 145.4 |
| KOH    | 6   | 6 | 49     | 0 | 0.99  | 3.39 | 0     | 0.8  | 94.6  |
| KOH    | 6   | 6 | 74     | 0 | 0.99  | 3.39 | 0     | 0.8  | 146.7 |
| Na2SO4 | 0.5 | 3 | 290    | 0 | 0.123 | 0    | 0     | 0.8  | 143.2 |
| Na2SO4 | 0.5 | 3 | 290    | 0 | 0.136 | 0    | 0     | 0.8  | 123.4 |
| H2SO4  | 1   | 7 | 290    | 0 | 0     | 9.29 | 5.49  | 0.8  | 54    |
| KOH    | 1   | 6 | 290    | 0 | 0     | 9.29 | 5.49  | 0.8  | 36.25 |
| KOH    | 2   | 6 | 0.9869 | 0 | 1.165 | 0    | 0     | 0.9  | 149   |
| NaOH   | 2   | 0 | 0.9869 | 0 | 1.165 | 0    | 0     | 0.9  | 144.5 |
| LiOH   | 2   | 0 | 0.9869 | 0 | 1.165 | 0    | 0     | 0.9  | 142   |
| KOH    | 2   | 6 | 0      | 0 | 1.165 | 0    | 0     | 0.9  | 121   |
| KOH    | 2   | 6 | 0      | 0 | 1.165 | 0    | 0     | 0.9  | 141   |
| Li2SO4 | 1   | 0 | 278    | 0 | 0     | 0    | 0     | 0.9  | 212   |
| Li2SO4 | 1   | 0 | 314    | 0 | 0     | 0    | 0     | 0.9  | 258   |
| Li2SO4 | 1   | 0 | 291    | 0 | 0     | 0    | 0     | 0.9  | 231   |
| H2SO4  | 1   | 7 | 325    | 0 | 1.16  | 0    | 0     | 0.85 | 357   |
| H2SO4  | 1   | 7 | 325    | 0 | 1.16  | 0    | 0     | 0.85 | 212   |
| H2SO4  | 1   | 7 | 325    | 0 | 1.16  | 0    | 0     | 0.85 | 192   |
| H2SO4  | 1   | 7 | 325    | 0 | 1.16  | 0    | 0     | 0.85 | 179   |
| H2SO4  | 1   | 7 | 325    | 0 | 1.16  | 0    | 0     | 0.85 | 176   |
| H2SO4  | 1   | 7 | 353    | 0 | 1.1   | 0    | 0     | 0.85 | 242   |
| H2SO4  | 1   | 7 | 353    | 0 | 1.1   | 0    | 0     | 0.85 | 141   |
| H2SO4  | 1   | 7 | 353    | 0 | 1.1   | 0    | 0     | 0.85 | 126   |
| H2SO4  | 1   | 7 | 353    | 0 | 1.1   | 0    | 0     | 0.85 | 112   |
| H2SO4  | 1   | 7 | 353    | 0 | 1.1   | 0    | 0     | 0.85 | 100   |
| KOH    | 6   | 6 | 0      | 0 | 1.05  | 0    | 0     | 1    | 215   |
| KOH    | 6   | 6 | 0      | 0 | 1.05  | 0    | 0     | 1    | 181   |
| KOH    | 6   | 6 | 0      | 0 | 1.05  | 0    | 0     | 1    | 179   |
| KOH    | 6   | 6 | 0      | 0 | 1.05  | 0    | 0     | 1    | 172   |
| Na2SO4 | 1   | 3 | 371    | 0 | 0     | 0    | 0     | 1    | 69    |
| KOH    | 1   | 6 | 428    | 0 | 0.41  | 0    | 0     | 1    | 81.14 |
| KOH    | 1   | 6 | 428    | 0 | 0.41  | 0    | 0     | 1    | 49    |
| KOH    | 1   | 6 | 428    | 0 | 0.41  | 0    | 0     | 1    | 25    |
| KOH    | 1   | 6 | 428    | 0 | 0.41  | 0    | 0     | 1    | 13.25 |
| KOH    | 6   | 6 | 105    | 0 | 0     | 0    | 0     | 0.5  | 1327  |

|        |     |   |     |      |      |   |   |     |        |
|--------|-----|---|-----|------|------|---|---|-----|--------|
| KOH    | 6   | 6 | 105 | 0    | 0    | 0 | 0 | 0.5 | 1100   |
| KOH    | 6   | 6 | 105 | 0    | 0    | 0 | 0 | 0.5 | 1000   |
| KOH    | 6   | 6 | 105 | 0    | 0    | 0 | 0 | 0.5 | 943    |
| H2SO4  | 1   | 7 | 568 | 0    | 0.79 | 0 | 0 | 1.2 | 1544   |
| H2SO4  | 1   | 7 | 568 | 0    | 0.79 | 0 | 0 | 1.2 | 1274   |
| H2SO4  | 1   | 7 | 568 | 0    | 0.79 | 0 | 0 | 1.2 | 1102   |
| H2SO4  | 1   | 7 | 568 | 0    | 0.79 | 0 | 0 | 1.2 | 980    |
| H2SO4  | 1   | 7 | 568 | 0    | 0.79 | 0 | 0 | 1.2 | 964    |
| KOH    | 6   | 6 | 215 | 0    | 0    | 0 | 0 | 0.9 | 379    |
| KOH    | 6   | 6 | 280 | 0    | 0    | 0 | 0 | 0.9 | 306    |
| KOH    | 6   | 6 | 198 | 0    | 1.01 | 0 | 0 | 0.9 | 185    |
| H2SO4  | 1   | 7 | 390 | 0    | 0    | 0 | 0 | 1.2 | 620    |
| H2SO4  | 1   | 7 | 365 | 0    | 0    | 0 | 0 | 1.2 | 600    |
| H2SO4  | 1   | 7 | 295 | 0    | 0    | 0 | 0 | 1.2 | 490    |
| H2SO4  | 1   | 7 | 0   | 0    | 0    | 0 | 0 | 1   | 187    |
| H2SO4  | 1   | 7 | 0   | 0    | 0    | 0 | 0 | 1   | 136.51 |
| KOH    | 6   | 6 | 0   | 0    | 1.04 | 0 | 0 | 1   | 702    |
| KOH    | 6   | 6 | 0   | 0    | 1.04 | 0 | 0 | 1   | 260    |
| Na2SO4 | 1   | 3 | 371 | 0    | 0    | 0 | 0 | 0.9 | 53     |
| KOH    | 1   | 6 | 47  | 0.34 | 0.45 | 0 | 0 | 1   | 33     |
| H2SO4  | 1   | 7 | 47  | 0.34 | 0.45 | 0 | 0 | 1   | 25     |
| Na2SO4 | 1   | 3 | 47  | 0.34 | 0.45 | 0 | 0 | 1   | 13     |
| KOH    | 6   | 6 | 903 | 0    | 1.51 | 0 | 0 | 1   | 401    |
| KOH    | 6   | 6 | 903 | 0    | 1.51 | 0 | 0 | 1   | 271    |
| KOH    | 6   | 6 | 903 | 0    | 1.51 | 0 | 0 | 1   | 394    |
| KOH    | 6   | 6 | 903 | 0    | 1.51 | 0 | 0 | 1   | 387    |
| KOH    | 6   | 6 | 903 | 0    | 1.51 | 0 | 0 | 1   | 136    |
| Na2SO4 | 0.1 | 3 | 0   | 0    | 1.25 | 0 | 0 | 0.8 | 278    |
| Na2SO4 | 0.1 | 3 | 0   | 0    | 1.25 | 0 | 0 | 0.8 | 131    |

Where ECF is Electrolyte Chemical Formula, EC is Electrolyte Concentration, EIC is Electrolyte Ionic Conductivity, SSA is Specific Surface Area, PS is Pore Size, and VW is Voltage Window.
